# Supplementary material for: Antimicrobial resistance and associated genetic background of Histophilus somni isolated from clinically affected and healthy cattle
Source: Front Vet Sci. 2022 Oct 25;9:1040266. doi: 10.3389/fvets.2022.1040266 (PMC9645265; doi:10.3389/fvets.2022.1040266)
Supplement: Supplementary file 2 [file Table_2.XLSX]

## Sheet: Sheet1
Supplementary Table S2. PCR information.
PCR target	Antimicrobial agent	Primer name (F/R)a	Primer sequence (5'-3') (F/R)a	Annealing temp.	References
H. somni specific PCR
16S rDNA of H. somni		HS453_F/HS860_R	GAAGGCGATTAGTTTAAGAG/TTCGGGCACCAAGTRTTCA	55	Angen et al. 1998.
Resistance genes
blaROB-1	ABPC, AMPC	rob-1_F/rob-1_R	TGTTGCAATCGCTGCC/TTATCGTACACTTTCCA	45	San Millan et al. 2007.
blaOXA-2		blaOXA-2 _F/blaOXA-2 _R	GCAGACGAACGCCAAGCGGA/CCCGCACGATTGCCTCCCTC	64	Klima et al. 2014.
aadB	KM	aadB_F/aadB_R	TTACGCAGCAGGGCAGTCGC/GCGGCACGCAAGACCTCAAC	66	Klima et al. 2014.
aphA-1		aphA-1_F/aphA-1_R	TTATGCCTCTTCCGACCATC/GAGAAAACTCACCGAGGCAG	54	Klima et al. 2014.
aadA25	SM	aadA25_F/aadA25_R	GCAGTGGATGGCGGCCTGAA/TCGGCGCGATTTTGCCGGTT	66	Klima et al. 2014.
strA		strA_F/strA_R	AAGGCAAGGCGTTCGCGGTC/CCGGCGGCTGATCTGTCTGG	64	Klima et al. 2014.
strB		strB_F/strB_R	TCGCACCTGCTTGATCGCGG/GCTCGAATATGCCGGGGAGCG	64	Klima et al. 2014.
floR	FFC	ICE floR_F/ICE floR_R	GACGGTTCGCGACGTTTATG/GAAGACGAAGAAGGTGCCCA	58	Klima et al. 2014.
erm(42)	EM,TS	erm(42)_F/erm(42)_R	GGGTGAAAAGGGCGTTTATT/ACGTTGCACTTGGTTTGACA	60	Klima et al. 2014.
msrE		msr(E)_F/mph(E)_R	ACCAGCCACCTTGATCTCAATG/GTTCCATTCGATCCAGTTATAGCG	60	Klima et al. 2014.
mphE		mph(E)_F/mph(E)_R	TCTGTAGCGGGTTTCCAATTGC/AATGGTTGCTGCGTATTCCTCG	60	Klima et al. 2014.
tetH	OTC	tet(H)_F/tet(H)_R	ATACTGCTGATCACCGT/TCCCAATAAGCGACGCT	60	Klima et al. 2014.
tetR		ICE tetR_F/ICE tetR_R	CGGCTTGGGTTAATAATGGCG/ATAACGCGAAAAGCTTCCGC	58	Klima et al. 2014.
ICE associated genes
parB		pParBF/pParBR	GCTTGGCTCTTCATTGCTCG/TTTCTCCTCCTTGTTGGCGA	62	Beker et al. 2018.
ICE-rel1		pRelF/pRelR	GGCTCACGTTGGTTTGCTTG/TCAGCGGCAGTTTTGCTAAC	62	Beker et al. 2018.
int1		pInt1F/pInt1R	TAGAACGGAATCATAGACCTGCC/TGGATTTGCCTTTCTGTTAGTAGT	62	Beker et al. 2018.
int2		pInt2F/pInt2R	TCAACATTTCCACATCGTGCTC/AAGAGGACAGCCAATGAGCC	62	Beker et al. 2018.
a F, forward primes; R, reverse primers.
References Angen O, Ahrens P, Tegtmeier C. Development of a PCR test for identification of Haemophilus somnus in pure and mixed cultures. Vet Microbiol. (1998) 63:39–48. doi: 10.1016/s0378-1135(98)00222-3 Beker M, Rose S, Lykkebo CA, Douthwaite S. Integrative and Conjugative Elements (ICEs) in Pasteurellaceae Species and Their Detection by Multiplex PCR. Front Microbiol. (2018) 9:1329. doi: 10.33…
